# Supplementary material for: Somatostatin Receptors and Chemokine Receptor CXCR4 in Lymphomas: A Histopathological Review of Six Lymphoma Subtypes
Source: Frontiers journal article supplement (doi:10.3389/fonc.2021.710900), 2021-07-08
Supplement: Table_1.pdf [file Table_1.pdf]

**SUPPLEMENTAL MATERIAL 1. SSTR2, 3, 5 and CXCR4 immunohistochemical stainings of 103 lymphoma patients.**

|         |                   |                       |             | SSTR2     |         | SSTR3     |         | SSTR5     |         | CXCR4     |         |
|---------|-------------------|-----------------------|-------------|-----------|---------|-----------|---------|-----------|---------|-----------|---------|
| Patient |                   |                       |             |           |         |           |         |           |         |           |         |
| ID      | Lymphoma subtype  | Biopsy location       | Biopsy type | Intensity | Percent | Intensity | Percent | Intensity | Percent | Intensity | Percent |
| N1      | MCL               | Bone marrow           | Trephine    | 0         |         | 0         |         | 0         |         | 0         |         |
| N2      | MCL (blastoid)    | Nasopharynx           | Surgical    | 0         |         | 0         |         | 0         |         | 1 (m)     | 50      |
| N3      | MCL               | Lymph node (ingunal)  | Surgical    | 0         |         | 0         |         | 0         |         | 0         |         |
| N4      | MCL               | Lymph node (ingunal)  | Surgical    | 0         |         | 0         |         | 0         |         | 0         |         |
| N5      | MCL (blastoid)    | Nasopharynx           | Surgical    | 0         |         | 0         |         | 1 (c)     | 30      | 1 (c dot) | 20      |
| N6      | MCL               | Lymph node (axillary) | Surgical    | 0         |         | 0         |         | 0         |         | 0         |         |
| N7      | MCL               | Bone marrow           | Trephine    | 0         |         | 0         |         | 0         |         | 0         |         |
| N8      | MCL (blastoid)    | Lymph nore (cervical) | Surgical    | 0         |         | 0         |         | 0         |         | 0         |         |
| N9      | MCL               | Bone marrow           | Trephine    | 0         |         | 0         |         | 0         |         | 0         |         |
| N10     | MCL               | Bone marrow           | Trephine    | 0         |         | 0         |         | 0         |         | 0         |         |
| N11     | MCL               | Bone marrow           | Trephine    | 0         |         | 0         |         | 0         |         | 0         |         |
| N12     | MCL               | Lymph node (inguinal) | Surgical    | 0         |         | 0         |         | 0         |         | 0         |         |
| N13     | MCL               | Lymph node (inguinal) | Surgical    | 0         |         | 0         |         | 0         |         | 0         |         |
| N14     | MCL               | Lymph node (axillary) | Surgical    | 0         |         | 0         |         | 0         |         | 0         |         |
| N15     | MCL (blastoid)    | Lymph node (inguinal) | Surgical    | 0         |         | 0         |         | 0         |         | 0         |         |
| N16     | MCL               | Lymph node            | Core        | 0         |         | 0         |         | 0         |         | 0         |         |
| N17     | MCL               | Lymph nore (cervical) | Surgical    | 0         |         | 0         |         | 0         |         | 0         |         |
| N18     | MCL               | Lymph node (inguinal) | Surgical    | 0         |         | 0         |         | 0         |         | 0         |         |
| N19     | MCL               | Hypopharynx           | Surgical    | 0         |         | 0         |         | 0         |         | 0         |         |
| N20     | MCL (pleomorphic) | Lymph node (cecum)    | Surgical    | 0         |         | 0         |         | 0         |         | 3 (m)     | 90      |
| N21     | DLBCL (ABC)       | Lymph nore (cervical) | Surgical    | 0         |         | 0         |         | 0         |         | 1 (c dot) | 20      |
| N22     | DLBCL (GCB)       | Tonsil                | Surgical    | 2 (m)     | 100     | 0         |         | 0         |         | 0         |         |
| N23     | DLBCL (ABC)       | Lymph node (axillary) | Surgical    | 0         |         | 0         |         | 0         |         | 1 (c dot) | 10      |
| N24     | DLBCL (GCB)       | Kidney                | Core        | 0         |         | 0         |         | 0         |         | 2 (m/c)   | 50      |
| N25     | DLBCL (GCB)       | Tonsil                | Surgical    | 2 (m)     | 90      | 0         |         | 0         |         | 1 (c)     | 5       |
| N26     | DLBCL (GCB)       | Lymph node (inguinal) | Surgical    | 3 (m)     | 100     | 0         |         | 0         |         | 1 (c)     | 10      |

|     |                             |                        |          |           |     |           |    |       |     |             |    |
|-----|-----------------------------|------------------------|----------|-----------|-----|-----------|----|-------|-----|-------------|----|
| N27 | DLBCL (ABC)                 | Testis                 | Surgical | 3 (m/c)   | 80  | 0         |    | 0     |     | 1 (c)       | 10 |
| N28 | DLBCL (GCB)                 | Lymph node (cervical)  | Surgical | 1 (c dot) | 10  | 0         |    | 0     |     | 2 (m/c dot) | 50 |
| N29 | DLBCL (ABC)                 | Upper jaw              | Surgical | 3 (m)     | 100 | 0         |    | 0     |     | 0           |    |
| N30 | DLBCL (ABC)                 | Lymph node (axillary)  | Surgical | 0         |     | 1 (c dot) | 5  | 0     |     | 2 (c dot)   | 50 |
| N31 | DLBCL (GCB)                 | Tonsil                 | Surgical | 3 (m)     | 100 | 0         |    | 0     |     | 2 (m/c)     | 50 |
| N32 | DLBCL (ABC)                 | Mediastinum            | Surgical | 2 (m/c)   | 100 | 0         |    | 0     |     | 0           |    |
| N33 | DLBCL (GCB)                 | Lymph node (cervical)  | Surgical | 0         |     | 0         |    | 0     |     | 0           |    |
| N34 | DLBCL (GCB)                 | Lymph node (inguinal)  | Surgical | 0         |     | 0         |    | 0     |     | 2 (m/c)     | 70 |
| N35 | DLBCL (GCB)                 | Upper jaw              | Surgical | 3 (m)     | 90  | 0         |    | 0     |     | 1 (c dot)   | 20 |
| N36 | DLBCL (GCB)                 | Small intestine        | Surgical | 0         |     | 0         |    | 0     |     | 2 (c dot)   | 50 |
| N37 | DLBCL (GCB)                 | Lymph node jaw         | Surgical | 2 (m)     | 70  | 0         |    | 0     |     | 2 (m/c)     | 70 |
| N38 | DLBCL (GCB)                 | Spinal column          | Surgical | 1 (m)     | 20  | 0         |    | 0     |     | 0           |    |
| N39 | DLBCL (ABC)                 | Lymph node (cervical)  | Surgical | 0         |     | 0         |    | 0     |     | 0           |    |
| N40 | DLBCL (GCB)                 | Mesentery              | Surgical | 0         |     | 0         |    | 1 (c) | 100 | 0           |    |
| N41 | DLBCL (ABC)                 | Small intestine        | Surgical | 0         |     | 0         |    | 0     |     | 1 (m/c dot) | 2  |
| N42 | DLBCL (T-cell predominance) | Lymph node (mesentery) | Surgical | 0         |     | 0         |    | 0     |     | 2 (m/c)     | 80 |
| N43 | DLBCL (GCB)                 | Abdomen                | Core     | 0         |     | 0         |    | 0     |     | 0           |    |
| N44 | DLBCL (GCB)                 | Lymph node (cervical)  | Surgical | 0         |     | 0         |    | 0     |     | 0           |    |
| N45 | HL nodular sclerosis        | Skin                   | Surgical | 0         |     | 0         |    | 1 (c) | 50  | 1 (c)       | 40 |
| N46 | HL mixed cellularity        | Lymph node (cervical)  | Surgical | 2 (m)     | 80  | 0         |    | 0     |     | 1 (m/c dot) | 90 |
| N47 | HL nodular sclerosis        | Lymph node (cervical)  | Surgical | 2 (m)     | 80  |           |    | 0     |     |             |    |
| N48 | HL nodular sclerosis        | Lymph node (cervical)  | Surgical | 0         |     | 0         |    | 0     |     | 0           |    |
| N49 | HL mixed cellularity        | Lymph node (cervical)  | Surgical | 1 (m)     | 70  | 1 (m/c)   | 50 | 1 (c) | 50  | 0           |    |
| N50 | HL mixed cellularity        | Lymph node (axillary)  | Surgical | 2 (m/c)   | 80  | 1 (c)     | 30 | 1 (c) | 30  | 3 (m/c)     | 90 |
| N51 | NLPHL                       | Lymph node (axillary)  | Surgical | 0         |     | 0         |    | 1 (c) | 80  | 0           |    |
| N52 | HL mixed cellularity        | Lymph node (cervical)  | Surgical | 0         |     | 0         |    | 0     |     | 2 (m/c dot) | 90 |
| N53 | HL nodular sclerosis        | Lymph node (cervical)  | Surgical | 0         |     | 1 (c)     | 80 | 0     |     | 0           |    |
| N54 | NLHPL                       | Lymph node (axillary)  | Surgical | 1 (m)     | 50  | 0         |    | 0     |     | 1 (m)       | 50 |
| N55 | HL mixed cellularity        | Colon                  | Surgical | 3 (m)     | 80  | 0         |    | 0     |     | 2 (m/c)     | 80 |

|     |                      |                          |          |         |     |           |    |   |  |           |    |
|-----|----------------------|--------------------------|----------|---------|-----|-----------|----|---|--|-----------|----|
| N56 | HL nodular sclerosis | Lymph node (inguinal)    | Surgical | 2 (m)   | 80  | 0         |    | 0 |  | 2 (m/c)   | 60 |
| N57 | HL nodular sclerosis | Lymph node mediastinum   | Surgical | 1 (m)   | 90  | 0         |    | 0 |  | 1 (m)     | 40 |
| N58 | HL nodular sclerosis | Lymph node (axillary)    | Surgical | 1 (m)   | 25  | 1 (c )    | 25 | 0 |  | 2 (m/c)   | 70 |
| N59 | HL nodular sclerosis | Lymph node (cervical)    | Surgical | 1 (m)   | 80  | 0         |    | 0 |  | 1 (m)     | 70 |
| N60 | HL mixed cellularity | Spleen                   | Surgical | 0       |     | 2 (c )    | 40 | 0 |  | 1 (m/c)   | 50 |
| N61 | CHL NOS              | Bone                     | Core     | 0       |     | 1 (c dot) | 60 | 0 |  | 1 (c dot) | 60 |
| N62 | HL nodular sclerosis | Lymph node (cervical)    | Surgical | 0       |     | 0         |    | 0 |  | 2 (m/c)   | 70 |
| N63 | Follicular lymphoma  | Abdomen                  | Core     | 2 (m)   | 100 | 0         |    | 0 |  | 1 (m)     | 5  |
| N64 | Follicular lymphoma  | Lymph node (axillary)    | Surgical | 1 (m)   | 100 | 0         |    | 0 |  | 1 (m)     | 20 |
| N65 | Follicular lymphoma  | Lymph node (cervical)    | Surgical | 2 (m)   | 100 | 0         |    | 0 |  | 0         |    |
| N66 | Follicular lymphoma  | Lymph node (mesenterium) | Surgical | 2 (m/c) | 100 | 0         |    | 0 |  | 1 (m/c)   | 40 |
| N67 | Follicular lymphoma  | Lymph node (cervical)    | Surgical | 1 (m)   | 50  | 0         |    | 0 |  | 0         |    |
| N68 | Follicular lymphoma  | Lymph node (axillary)    | Surgical | 0       |     | 0         |    | 0 |  | 2 (m/c)   | 80 |
| N69 | Follicular lymphoma  | Lymph node (cervical)    | Surgical | 1 (c )  | 50  | 0         |    | 0 |  | 2 (m)     | 50 |
| N70 | Follicular lymphoma  | Lymph node (mesenterium) | Surgical | 0       |     | 0         |    | 0 |  | 1 (c )    | 40 |
| N71 | Follicular lymphoma  | Lymph node (mesenterium) | Surgical | 1 (m)   | 20  | 0         |    | 0 |  | 1 (m)     | 20 |
| N72 | Follicular lymphoma  | Lymph node (abdomen)     | Surgical | 1 (c)   | 50  | 0         |    | 0 |  | 1 (c )    | 50 |
| N73 | Follicular lymphoma  | Lymph node (abdomen)     | Surgical | 1 (m/c) | 70  | 0         |    | 0 |  | 2 (m/c)   | 70 |

|     |                     |                       |          |         |    |   |  |       |    |           |    |
|-----|---------------------|-----------------------|----------|---------|----|---|--|-------|----|-----------|----|
| N74 | Follicular lymphoma | Lymph node (cervical) | Surgical | 0       |    | 0 |  | 0     |    | 0         |    |
| N75 | Follicular lymphoma | Lymph node (axillary) | Surgical | 0       |    | 0 |  | 0     |    | 0         |    |
| N76 | Follicular lymphoma | Lymph node (abdomen)  | Core     | 0       |    | 0 |  | 0     |    | 0         |    |
| N77 | Follicular lymphoma | Lymph node (cervical) | Surgical | 0       |    | 0 |  | 0     |    | 0         |    |
| N78 | Follicular lymphoma | Tonsil                | Surgical | 0       |    | 0 |  | 0     |    | 0         |    |
| N79 | Follicular lymphoma | Lymph node (cervical) | Surgical | 2 (m/c) | 80 | 0 |  | 0     |    | 0         |    |
| N80 | Follicular lymphoma | Lymph node (cervical) | Surgical | 0       |    | 0 |  | 0     |    | 0         |    |
| N81 | Follicular lymphoma | Lymph node (cervical) | Surgical | 0       |    | 0 |  | 0     |    | 0         |    |
| N82 | Follicular lymphoma | Lymph node (cervical) | Surgical | 3 (m)   |    | 0 |  | 0     |    | 2 (m)     | 25 |
| N83 | Follicular lymphoma | Lymph node (inguinal) | Surgical | 2 (m)   |    | 0 |  | 0     |    | 0         | 70 |
| N84 | Follicular lymphoma | Lymph node (cervical) | Surgical | 0       |    | 0 |  | 0     |    | 0         |    |
| N85 | PTCL                | Lymph node (axillary) | Surgical | 0       |    | 0 |  | 0     |    | 0         |    |
| N86 | PTCL (cytotoxic)    | Nose                  | Surgical | 0       |    | 0 |  | 3 (m) | 70 | 0         |    |
| N87 | PTCL                | Lymph node (inguinal) | Core     | 0       |    | 0 |  | 0     |    | 0         |    |
| N88 | PTCL (Lennert)      | Lymph node (axillary) | Surgical | 0       |    | 0 |  | 0     |    | 0         |    |
| N89 | PTCL                | Lymph node (leg)      | Surgical | 0       |    | 0 |  | 0     |    | 0         |    |
| N90 | PTCL                | Sternum               | Core     | 0       |    | 0 |  | 1 (c) | 50 | 1 (c dot) | 15 |
| N91 | PTCL                | Lymph node (cervical) | Surgical | 0       |    | 0 |  | 0     |    | 0         |    |

|      |                                  |                       |          |       |    |   |  |       |    |         |    |
|------|----------------------------------|-----------------------|----------|-------|----|---|--|-------|----|---------|----|
| N92  | ALCL (breast-implant associated) | Breast                | Surgical | 0     |    | 0 |  | 0     |    | 2 (m)   | 50 |
| N93  | ALCL                             | Skin                  | Surgical | 1 (m) | 90 | 0 |  | 2 (c) | 90 | 0       |    |
| N94  | ALCL                             | Bone marrow           | Trephine | 0     |    | 0 |  | 0     |    | 1 (m/c) | 50 |
| N95  | Extranodal MALT                  | Lymph node (inguinal) | Surgical | 0     |    | 0 |  | 0     |    | 0       |    |
| N96  | Extranodal MALT                  | Submandibular gland   | Surgical | 0     |    | 0 |  | 0     |    | 0       |    |
| N97  | Gastric MALT                     | Stomach               | Surgical | 0     |    | 0 |  | 0     |    | 0       |    |
| N98  | Extranodal MALT                  | Parotid gland         | Surgical | 0     |    | 0 |  | 0     |    | 0       |    |
| N99  | Extranodal MALT                  | Lymph node (cheek)    | Surgical | 0     |    | 0 |  | 0     |    | 0       |    |
| N100 | Extranodal MALT                  | Conjunctiva           | Surgical | 0     |    | 0 |  | 0     |    | 0       |    |
| N101 | Extranodal MALT                  | Lymph node (cervical) | Surgical | 0     |    | 0 |  | 0     |    | 0       |    |
| N102 | Extranodal MALT                  | Bone marrow           | Trephine | 0     |    | 0 |  | 0     |    | 0       |    |
| N103 | Gastric MALT                     | Stomach               | Surgical | 0     |    | 0 |  | 0     |    | 0       |    |

MCL=mantle cell lymphoma, DLBCL=diffuse large B-cell lymphoma, ABC=activated B-cell, GCB=germinal center B-cell, HL=Hodgkin lymphoma, CHL=classic Hodgkin lymphoma, NOS=not otherwise specified, NLPHL=nodular lymphocyte-predominant Hodgkin lymphoma, PTCL=peripheral T-cell lymphoma, ALCL=anaplastic large B-cell lymphoma, MALT=mucosa-associated lymphoid tissue lymphoma.

Staining intensity is scored as no staining (0), mild (1), moderate (2) or strong (3).

Percent is presented as how many percent of the malignant cells were stained positive.

(m)=membranous staining in the malignant cells

(c )=cytoplasmic staining in the malignant cells

(c dot)=cytoplasmic dot-like staining in the malignant cells
